RESEARCH ARTICLE

# Seasonality of antimicrobial resistance rates in respiratory bacteria: A systematic review and meta-analysis

Evelyn Pamela Martinez<sup>1,2</sup>\*, Magda Cepeda<sup>3</sup>, Marija Jovanoska<sup>4</sup>, Wichor M. Bramer<sup>5</sup>, Josje Schoufour<sup>2</sup>, Marija Glisic<sup>6</sup>, Annelies Verbon<sup>2</sup>, Oscar H. Franco<sup>7</sup>

**1** Facultad de Medicina Veterinaria y Zootecnia, Universidad Central del Ecuador, Quito, Ecuador, **2** Department of Microbiology and Infectious Diseases, Erasmus MC, University Medical Centre, Rotterdam, the Netherlands, **3** Department of Epidemiology, Erasmus MC, University Medical Centre, Rotterdam, the Netherlands, **4** Medical Faculty, Saints Cyril and Methodius University of Skopje, Skopje, Macedonia, **5** Medical Library, Erasmus MC, University Medical Centre, Rotterdam, the Netherlands, **6** Leibniz Institute for Prevention Research and Epidemiology—BIPS, Bremen, Germany, **7** Institute of Social and Preventive Medicine, Faculty of Medicine, University of Bern, Bern, Switzerland

\* These authors contributed equally to this work.

\* [pmartinezl@uce.edu.ec](mailto:pmartinezl@uce.edu.ec)

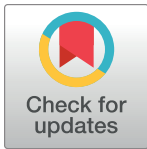

**OPEN ACCESS**

**Citation:** Martinez EP, Cepeda M, Jovanoska M, Bramer WM, Schoufour J, Glisic M, et al. (2019) Seasonality of antimicrobial resistance rates in respiratory bacteria: A systematic review and meta-analysis. PLoS ONE 14(8): e0221133. <https://doi.org/10.1371/journal.pone.0221133>

**Editor:** Dafna Yahav, Rabin Medical Center, Beilinson Hospital, ISRAEL

**Received:** May 7, 2019

**Accepted:** July 30, 2019

**Published:** August 15, 2019

**Copyright:** © 2019 Martinez et al. This is an open access article distributed under the terms of the [Creative Commons Attribution License](https://creativecommons.org/licenses/by/4.0/), which permits unrestricted use, distribution, and reproduction in any medium, provided the original author and source are credited.

**Data Availability Statement:** All relevant data are within the manuscript and its Supporting Information files.

**Funding:** EPM is supported by Universidad Central del Ecuador for her PhD studies. MC was supported by Ciencia, Tecnología e Innovación (COLCIENCIAS) de Colombia for her PhD studies. The rest of the authors have no support or funding to report. The funders had no role in study design, data collection and analysis, decision to publish, or preparation of the manuscript.

## Abstract

### Background

Antimicrobial resistance (AMR) rates may display seasonal variation. However, it is not clear whether this seasonality is influenced by the seasonal variation of infectious diseases, geographical region or differences in antibiotic prescription patterns. Therefore, we assessed the seasonality of AMR rates in respiratory bacteria.

### Methods

Seven electronic databases ([Embase.com](https://pubmed.ncbi.nlm.nih.gov/), Medline Ovid, Cochrane CENTRAL, Web of Science, Core Collection, Biosis Ovid, and Google Scholar), were searched for relevant studies from inception to Jun 25<sup>th</sup>, 2019. Studies describing resistance rates of *Streptococcus pneumoniae* and *Haemophilus influenzae* were included in this review. By using random-effects meta-analysis, pooled odd ratios of seasonal AMR rates were calculated using winter as the reference group. Pooled odd ratios were obtained by antibiotic class and geographical region.

### Results

We included 13 studies, of which 7 were meta-analyzed. Few studies were done in *H. influenzae*, thus this was not quantitatively analyzed. AMR rates of *S. pneumoniae* to penicillins were lower in other seasons than in winter with pooled OR = 0.71; 95% CI = 0.65–0.77; I<sup>2</sup> = 0.0%, and to all antibiotics with pooled OR = 0.68; 95% CI = 0.60–0.76; I<sup>2</sup> = 14.4%. Irrespective of geographical region, the seasonality of AMR rates in *S. pneumoniae* remained the same.

**Competing interests:** The authors have declared that no competing interests exist.

## Conclusion

The seasonality of AMR rates could result from the seasonality of infectious diseases and its accompanied antibiotic use.

## Introduction

Globally, bacterial respiratory infections are a leading cause of morbidity and mortality. *Streptococcus pneumoniae* and *Haemophilus influenzae* are a common cause of community-acquire pneumoniae and meningitis in children worldwide [1]. In 2015, pneumonia killed 920,136 children under 5 years, and accounted for 16% of all deaths in this age group [2]. In the last two decades, respiratory bacteria have increasingly becoming resistant to several antibiotics, and the prevalence of resistant strains is growing rapidly. Between the 20% to 30% of all pneumonias are caused by multidrug-resistant *S. pneumoniae* [1], and about the 30% to 40% are caused by penicillin-resistant *S. pneumoniae* [3–5]. Resistant infections lead to a longer stay in hospital, higher health-care costs, and increased mortality [6, 7]. In 2017, the World Health Organization (WHO) included *S. pneumoniae* and *H. influenzae* on the list of priority bacteria for which new antibiotics are needed [8].

Emerging evidence suggests that AMR rates in respiratory bacteria show seasonal variation as a results of a dynamic interaction between host and environment, and antibiotic selective pressure; however, results are highly variable among studies. For instance, prescription rates of penicillins, cephalosporins and macrolides increased by 75% and 100% in the winter compared to summer [9], which was associated with winter-peaks of resistance in *S. pneumoniae* to penicillins and cephalosporins [4, 10–12], whereas AMR rates to macrolides showed no seasonal variation [13]. A study in the United States showed that the rates of penicillin-resistant *S. pneumoniae* were higher in spring than in winter [5], while other studies in Spain showed higher resistance rates in both summer and winter [3, 13]. On the other hand, studies done in Israel and Lithuania reported higher resistance rates of multidrug-resistant *S. pneumoniae* in winter than in summer [14, 15]. Furthermore, resistant rates of *H. influenzae* to penicillins and macrolides tended to be higher in winter than in summer in a study done in Japan [16], while another study from Italy did not find significant differences in resistance rates between autumn and spring [17].

Although, the variability in the seasonality of AMR rates has been linked to seasonal variation of antibiotic consumption [18–20], other factors such as different patterns of antibiotic use or geographical region may influence on the variation of AMR rates [9, 18]. In this era of increasing trends of AMR, it is pivotal to understand all phenomena contributing to the selection of AMR. Thus, we summarized relevant published studies to assess the seasonality of AMR rates in respiratory bacteria, and to identify factors underlying this pattern.

## Materials and methods

This systematic review and meta-analysis follows the guidelines in the Preferred Reporting Items for Systematic Reviews and Meta-Analysis (PRISMA) Statement (S1 Table) [21].

## Search strategy and selection criteria

The search strategy in this systemtaic review was originally established to find studies addressing the variation of AMR rates per month and/or per season in five bacteria included on the

OMS priority bacteria list [8]: *Campylobacter spp.*, *Salmonella spp.*, *Escherichia coli*, *Streptococcus pneumoniae*, and *Haemophilus influenzae*. However, we decided to focus only on respiratory bacteria, because studies in *E. coli*, *Salmonella spp.* and *Campylobacter spp.* were not eligible for further analysis due to either few number of available studies or high heterogeneity making it difficult to compare them.

Relevant studies were searched in seven electronic databases ([Embase.com](https://pubmed.ncbi.nlm.nih.gov/), Medline Ovid, Cochrane CENTRAL, Web of Science, Core Collection, Biosis Ovid, and Google Scholar) from inception until October 23<sup>rd</sup>, 2018, with an update until Jun 25<sup>th</sup>, 2019. The search terms list is shown in the supporting information ([S1 Text](#)). Studies reporting AMR rates in respiratory bacteria from at least two different seasons were eligible for consideration. We included studies that fulfilled the following inclusion criteria: 1) being cross-sectional, cohort, time-series, and longitudinal studies in design; 2) describing bacteria isolates from humans; 3) measuring antibiotic resistance as the study goal; 4) standard methods used for antibiotic susceptibility testing; 5) primary outcome reported per month or season.

### Study selection and quality assessment

Titles were retrieved from each electronic database and duplicates removed. The review of retrieved studies was done based on the method of Bramer *et al.* [22]. Briefly, independently, four authors (EPM, MG, MJ, JS) screened the title and abstracts of the retrieved references. Selected references were full-text retrieved and assessed for inclusion eligibility independently by two authors (EPM, MJ). A third author (MC) was available to discuss disagreements. For additional studies, the reference lists of included studies were hand-searched and corresponding authors of selected studies were contacted via e-mail.

As there is no single recommended tool for assessing the quality of cross-sectional studies, we developed a modified version of the Newcastle-Ottawa Scale (NOS) for cohort and case-control studies [23]. We used five quality criteria: 1) the representativeness of sample source; 2) the length of follow-up; 3) comparability of the population within the study period; 4) reliability measure of antibiotic sensitivity; and 5) a clear description of the outcome ([S2 Text](#)).

### Data extraction and analysis

Data was extracted from text, tables or graphs from each selected study; and was recorded in a customized form for this systematic review. We extracted data regarding authors, year of publication, study location, and duration, study design, sample size, characteristics of the study population and season definition. Also, we extracted the frequency or percentage of resistance to any antibiotic class (including multi-resistance profiles) per season (or monthly) and per bacterial species.

Studies were categorized according to the WHO regions definition as follows: Europe (Spain, Israel, Lithuania, England, Italy and Norway), America (The United States and Costa Rica), South East Asia (Thailand and India), and Western Pacific (Japan and Australia). Based on the mechanism of action, antibiotics were categorized into the following classes: penicillins, cephalosporins, macrolides, sulphamides and trimethoprim. Also, multidrug-resistance categorization was used to define isolates resistant to more than two antibiotic classes.

Meteorological seasons were defined as winter (December to February), summer (June to August), autumn (September to October), and spring (March to May) for studies in the northern hemisphere, whereas for studies in the southern hemisphere the definition of seasons was opposite. For studies that present results with other season definitions such as: wet (December to April) and dry (May to November), and as cold (October to March), and warm (April to September) were not considered for quantitative analyses.

For the quantitative analyses, we calculated for each study the seasonal resistance rates according to antibiotic class and geographical region. For this calculation, we used as the numerator the number of resistant isolates, and as the denominator, the total number of isolates tested per season. Monthly resistance rates per year were provided, in this case resistance rates were pooled per month followed by season. In two studies [10, 11] the denominator was not available and this was imputed assuming the best-case scenario where the sampling was equally distributed across the length of the study. This assumption was based on the hypothesis that the proportion of resistance isolates would vary according to the season independently of the sample size. Thus, we calculated the denominator by dividing the overall number of isolates tested by the number of seasons included in the study (e.g. dividing by four if the study presented resistance rates in four seasons).

Secondly, we calculated separate seasonal resistance ratios according to antibiotic class using winter as the reference group. In an extra analyses, we compared spring and autumn in to include studies that only used these seasons, here spring was the reference group.

Finally, we carried out random-effects meta-analyses weighted by study size to calculate pooled odds ratios (OR) and 95% confidence intervals for each comparison stratified by antibiotic class and geographical region. Heterogeneity across studies was measured using the  $I^2$  test. We examined publication bias for each comparison by examining asymmetry funnel plots and using Egger's test. All tests were two-tailed and p-values < 0.05 were significant. Also, we performed sensitivity analyses by doing extra meta-analysis estimating pooled OR excluding studies carried on in countries located in different hemispheres, and those studies in which the denominator was imputed. All analyses were done using the statistical software STATA MP 14, and graphs were done in R 3.5.1 and R Studio 1.1.383.

## Results

### Description of included studies

We retrieved 3,851 unique references, of which 258 studies were full-text assessed, and 13 studies were included for the qualitative synthesis, of which seven were meta-analyzed (Fig 1). No additional studies were identified by authors contact or hand-search nor after updating the literature search.

Most of the studies were cross-sectional ( $n = 7$ ), performed in countries located in the northern hemisphere ( $n = 10$ ), and in European countries ( $n = 6$ ). The majority of studies were done for *S. pneumoniae* ( $n = 11$ ), and on isolates from community-acquired infections in children with acute otitis media ( $n = 9$ ). The most common resistance profile studied was against penicillins in *S. pneumoniae* isolates ( $n = 6$ ) (Table 1).

### Study quality

Quality assessment showed that most of included studies had fair quality (S2 Table). 11 (84.6%) studies were adjusted to control for confounders, and 12 (92.3%) studies used standard methods to measure the outcome of study. The common reason to score fair quality was the study time period, six studies (46.2%) did not allow us to categorize the four meteorological seasons (S2 Table).

### Seasonality of antimicrobial resistance rates

Only two studies reported seasonality of AMR rates in *H. influenzae* [16, 17], thus they were not meta-analyzed. One study showed higher AMR rates to penicillins in spring than in

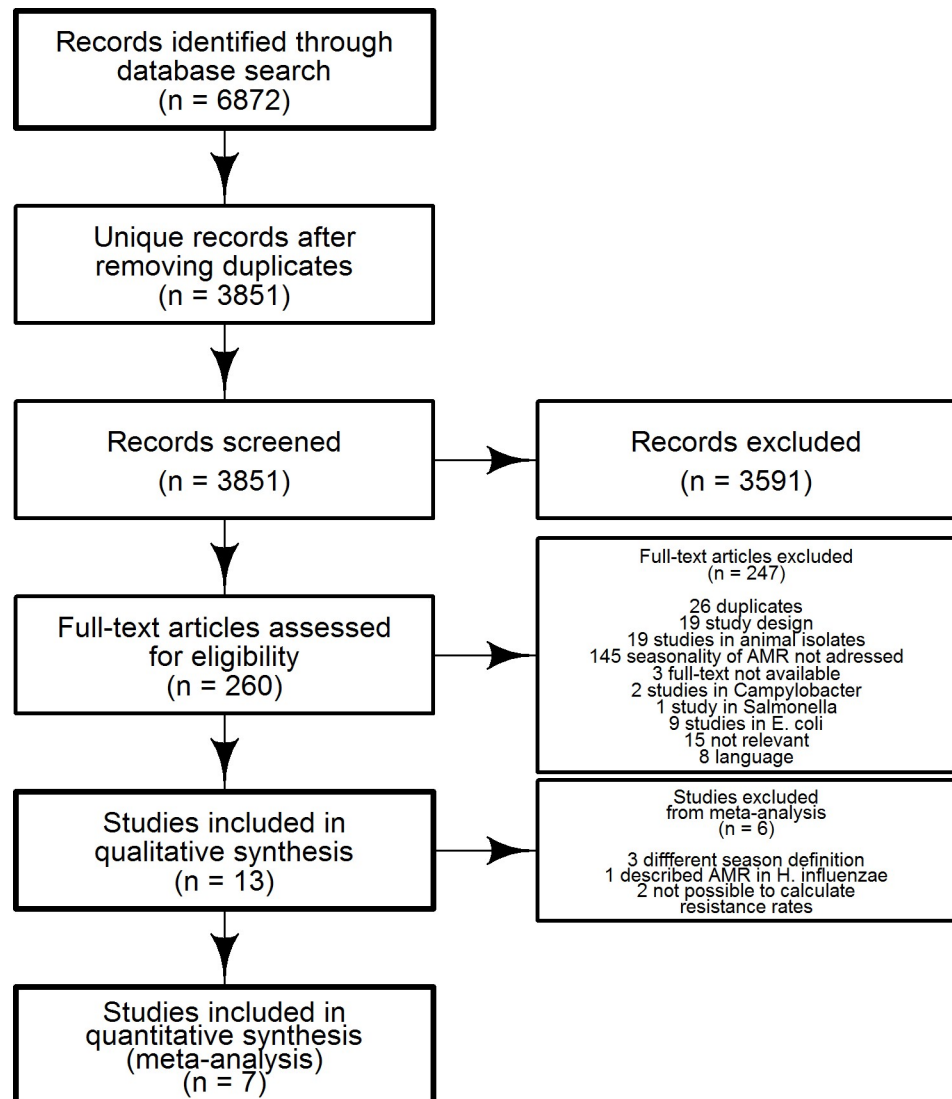

Fig 1. PRISMA flowchart summarizing the study selection process.

<https://doi.org/10.1371/journal.pone.0221133.g001>

autumn (10.1% vs 5.8%), whereas in the other study no significant differences in AMR rates to ampicillin between summer and winter were found (18.5% vs 16.8%;  $P > 0.05$ ).

Three studies reported AMR rates in *S. pneumoniae* with different season categorizations: wet vs dry [24], cold vs warm [14], and respiratory (i.e. winter and spring) vs non-respiratory seasons (i.e. summer and autumn) [12], and therefore were not meta-analyzed. These studies showed similar results as the meta-analyzed studies; higher AMR rates of penicillin-resistant isolates in the wet, respiratory season, and cold months (S3 Table).

In the seven studies [3–5, 10, 11, 13, 15] used for the meta-analysis, AMR rates of *S. pneumoniae* were lower in other seasons than in winter (pooled OR = 0.71; 95% CI = 0.65–0.77;  $I^2 = 0.0\%$ ). AMR rates of *S. pneumoniae* to penicillins were also lower in other seasons than in winter (pooled OR = 0.68. 95% CI = 0.60–0.76.  $I^2 = 14.4\%$ ) [3–5, 10, 11, 13] (Fig 2).

A sensitivity analysis was done only by excluding the two studies where the denominator was imputed, and the seasonal variation of AMR rates remained the same (S1 Fig). In

**Table 1. General descriptive information of included studies (n = 13).**

| Reference                                                  | Publication year | Study type      | Country    | Hemisphere | Study region | Study period                         | Sample source                                            | AMR breakpoint | Season definition | AMR pattern       |
|------------------------------------------------------------|------------------|-----------------|------------|------------|--------------|--------------------------------------|----------------------------------------------------------|----------------|-------------------|-------------------|
| <i>Streptococcus pneumoniae</i>                            |                  |                 |            |            |              |                                      |                                                          |                |                   |                   |
| Albanese et al. [12]                                       | 2002             | Cross-sectional | USA        | N          | AM           | Jan 1995 to Dec 1997                 | Patients with respiratory infections                     | CSLI           | 2                 | PEN               |
| Baquero et al. [13, 25]                                    | 1999             | Prospective     | Spain      | N          | EU           | May 1996 to Apr 1997                 | Patients with respiratory infections                     | CSLI           | 1                 | PEN               |
| Boken et al. [25]                                          | 1995             | Cross-sectional | USA        | N          | AM           | April to August 1994                 | Children aged 2 to 24 months with respiratory infections | CSLI           | 2                 | PEN               |
| Dagan et al. [14]                                          | 2008             | Prospective     | Israel     | N/E        | EU           | From 1998 to 2003                    | Children with acute otitis media                         | CSLI           | 3                 | PEN, CEP, MC, MDR |
| Guevara et al. [24]                                        | 2008             | Cross-sectional | Costa Rica | N/W        | AM           | From 1994 to 2004                    | Children until 2 years with otitis media                 | CSLI           | 4                 | PEN, MC           |
| Hoberman et al. [5]                                        | 2005             | Cross-sectional | USA        | N          | AM           | May 1991 to Apr 2003                 | Children 2 months to 7 years with respiratory infection  | CSLI           | 1                 | PEN, MC, TM/SUL   |
| Marco et al. [3]                                           | 2000             | Cross-sectional | Spain      | N          | EU           | May 1996 to Apr 1997                 | Patients with respiratory infections                     | CSLI           | 1                 | PEN, CEP, MC      |
| Siripongpreeda et al. [4]                                  | 2010             | Retrospective   | Thailand   | N/E        | SEA          | Jan 1997 to Dec 2007                 | Patients aged <18 with respiratory infection             | CSLI           | 5                 | PEN               |
| Stacevičienė et al. [15]                                   | 2016             | Prospective     | Lithuania  | N          | EU           | Feb 2012 to Mar 2013                 | Children aged <6 years with respiratory infection        | EUCAST         | 1                 | MDR               |
| Tam et al. [10]                                            | 2015             | Cross-sectional | USA        | N          | AM           | From 2007 to 2012                    | Children aged < 5 years with respiratory infection       | N/A            | 1                 | PEN               |
| Vardhan & Allen [11]                                       | 2003             | Prospective     | England    | N          | EU           | Jan 1987 to Dec 2000                 | Children with respiratory infection                      | CSLI           | 1                 | PEN               |
| <i>Streptococcus pneumoniae and Haemophilus influenzae</i> |                  |                 |            |            |              |                                      |                                                          |                |                   |                   |
| Marchisio et al. [17]                                      | 2001             | Longitudinal    | Italy      | N          | EU           | Oct–Nov in 1996, and Apr–May in 1997 | Healthy children aged 1 to 7 years.                      | CSLI           | 2                 | PEN, MC           |
| <i>Haemophilus influenzae</i>                              |                  |                 |            |            |              |                                      |                                                          |                |                   |                   |
| Hashida et al. [16]                                        | 2008             | Cross-sectional | Japan      | N          | WP           | Jul 2004 to Feb 2005                 | Healthy children aged 1 to 6 years                       | CSLI           | 5                 | PEN               |

N = Northern hemisphere, N/W = Northern/Western Hemisphere and N/E = Northern/Eastern hemisphere. EU = Europe, SEA = South-East Asia, WP = Western Pacific, and AM = Americas. 1 = Winter, Spring, Summer and Autumn, 2 = Spring vs Autumn, 3 = Cold vs Warm, 4 = Wet vs Dry, 5 = Winter vs Summer. CSLI = Clinical Laboratory Standards Institute, EUCAST = European Committee on Antibiotic Susceptibility Testing. PEN = penicillins, CEP = Cephalosporines, MC = Macrolides, SUL = Sulphamides, TM = Trimethoprim, and MDR = Multidrug-resistant. N/A = not available.

<https://doi.org/10.1371/journal.pone.0221133.t001>

additional analyses, we did not find differences in AMR rates of *S. pneumoniae* between spring and autumn independently of geographical region and antibiotic class (Fig 3). The description of the study weights for each meta-analysis are present in the supporting information S4 Table.

We identified relatively low heterogeneity ( $I^2 < 50\%$ ) among included studies, except in comparisons between autumn and spring ( $I^2 > 60\%$ ) (Figs 2 and 3). Based on observation of funnel plots, there was no evidence of publication bias (S2 Fig). However, we identified larger effect sizes of small-studies (Egger  $P < 0.05$ ) when comparing between summer and winter (S5 Table).

## Discussion

In this study we describe the seasonality of AMR rates in two respiratory bacteria *S. pneumoniae* and *H. influenzae*. Few studies have been done in *H. influenzae* and no meta-analysis was performed, but according to the available evidence AMR rates tended to be higher in winter



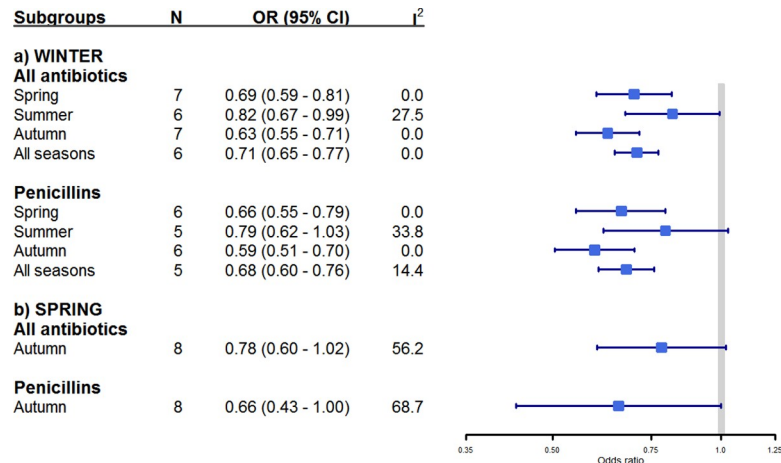

**Fig 2. Forest plot of seasonality of antimicrobial resistance rates in *Streptococcus pneumoniae* isolates.** Studies were stratified into two subgroups of antibiotics and estimates of effect are presented as pooled odds ratios (squares) with 95% confidence intervals (lateral lines of squares). For comparison, winter and spring were the reference groups, thus equal to one. Solid vertical line limits no difference between the two groups. I<sup>2</sup> refers to percentage of heterogeneity among studies. The “All antibiotics” subgroup includes penicillins, cephalosporins, macrolides, trimethoprim/sulphamides and multi-drug resistance.

<https://doi.org/10.1371/journal.pone.0221133.g002>

than summer. We found a consistent winter-peak of AMR rates in *S. pneumoniae* for penicillin and other antibiotics (i.e. cephalosporins, macrolides) independently of the geographical region.

The seasonal variation of AMR rates could result from a dynamic interaction of factors closely related with the seasonality of the infectious diseases such as higher antibiotic consumption [9, 18, 26], an increase of resistant strains during the peak of the infection [4, 12]. A 3-year population-based study in the USA, showed that the incidence rate of pneumococcal disease varied from 10 cases per 100,000 population in summer to 35–70 cases per 100,000 population in winter [27]. It was suggested that differences in host susceptibility, environmental factors, population behavior, and interactions among pathogens are determinants for seasonal incidence of pneumococcal infections [27–29]. For example, the winter-peak of incidence rates of pneumococcal infections was associated with photoperiod variation and inversely correlated with temperature (i.e. increased number of hours of darkness with cold temperatures)[27], which would result in a higher pathogen abundance in winter. Besides, it was shown significant correlation between the winter-peak of respiratory syncytial virus and penicillin-resistant *S. pneumoniae* peaking in the winter [29], and thus the potential interaction with respiratory virus may actively participate in the winter seasonal peak of AMR rates.

Furthermore, seasonal variation in outpatient antibiotic use has been reported in Europe and the United States. The total antibiotic use increase between 24% to 38% in the winter compared with summer [9, 18, 26], mostly due to the increase of use of penicillins, cephalosporins, and macrolides, which are broadly used to treat respiratory infections [30]. Other studies reported also high use of amoxicillin, amoxicillin-clavulanic acid, and quinolones in winter to treat upper respiratory infections [15]. This increase of antibiotic use in winter could lead to periods of multidrug-resistant isolates peaking. Moreover, the high antibiotic prescription rates in the winter have been found to be inappropriate, as also viral respiratory infections occur at higher rates during winter [9, 31, 32]. In a population-based study in the United States, it was shown that acute respiratory infections (e.g. sinusitis, otitis media, pneumoniae) account for 211 prescriptions per 1000 person per year, of which 111 prescriptions were

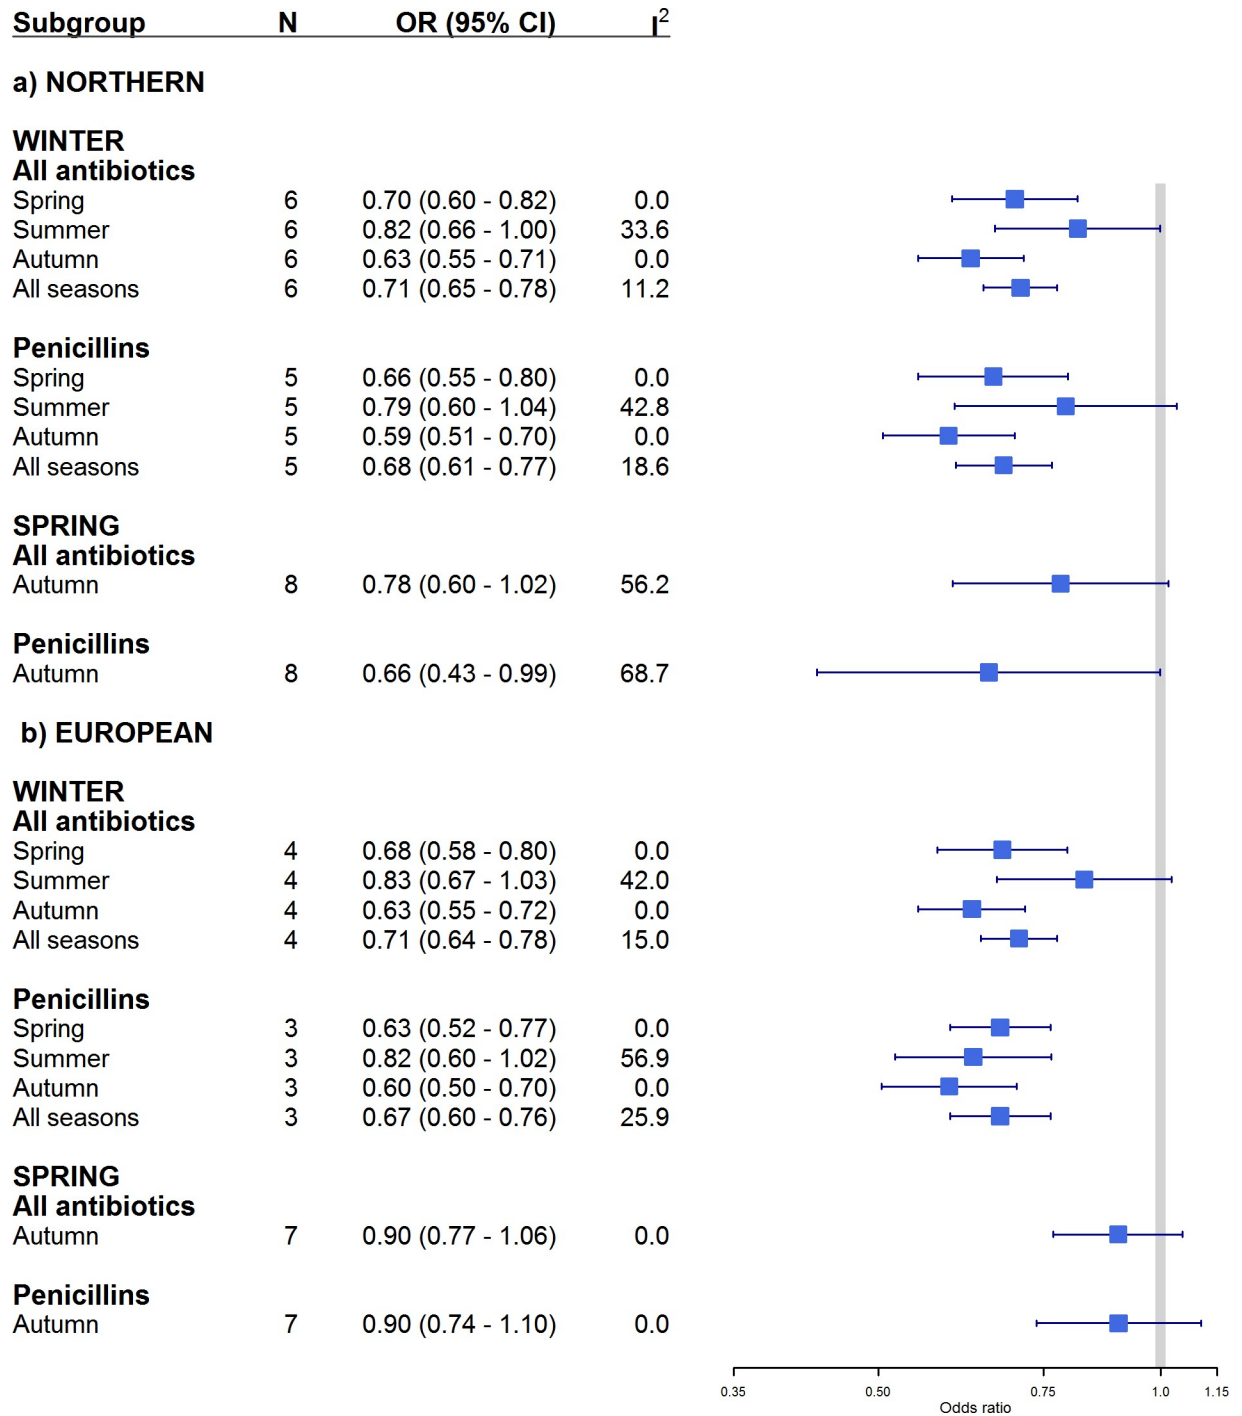

**Fig 3. Forest plot of seasonality of antimicrobial resistance rates in *Streptococcus pneumoniae* by geographical region.** Studies were stratified into two subgroups of antibiotics and estimates of effect are presented as pooled odds ratios (squares) with 95% confidence intervals (lateral lines of squares). For comparison, winter and spring were the reference groups, thus equal to one. Solid vertical line limits no difference between the two groups. I<sup>2</sup> refers to percentage of heterogeneity among studies. The “All antibiotics” group include penicillins, cephalosporins, and Multi-drug resistance. Northern refers to studies in the Northern hemisphere; European refers to studies done in Europe.

<https://doi.org/10.1371/journal.pone.0221133.g003>

estimated to be inappropriate [32]. This overuse probably increases the selection of resistant



bacteria, and harbors the risk of spread in the community due to indoor activities during winter [28].

Although we did not analyze the seasonal variation of outpatient antibiotic use, it was previously observed that a reduction of the total amount of antibiotic use in summer correlated with an overall reduction of MDR and single-drug resistance in *S. pneumoniae* isolates in the same season [14]. Similarly, a significant reduction of penicillin-resistant *S. pneumoniae* from 53% to 7% was found after a marked reduction of antibiotic use over a 4-month period [25]. Apparently, AMR impose high fitness cost on *S. pneumoniae* isolates reducing the transmissibility after antibiotic pressure is reduced [14]. Therefore, it may be expected that the reduction of antibiotic use in winter and spring will reduce AMR in the community in the same season. However, future studies are necessary to understand the seasonal and long-term impact of decreasing antibiotic use on resistance selection.

We did not find seasonal differences in rates in *S. pneumoniae* according to geographical region, despite that some studies show differences in choice of antibiotic class at various levels of the healthcare system (e.g. primary and secondary care) across regions, and in the structure of the pharmaceutical market across countries [9, 18]. Furthermore, within a country, socio-cultural determinants and educational level can influence the patient demands and the proclivity of medical doctors for prescribing antibiotics [33], leading to regional differences in prescription patterns. Regional differences in outpatients antibiotic use were shown in Europe; the Southern and Eastern regions showed a mean winter increase of antibiotic use of about 35%, whereas in Northern regions the use was 25% less in winter, compared to summer [18, 26].

We could not perform a meta-analysis in *H. influenzae*; however, it can be argued that the seasonality of AMR rates will be similar to that in *S. pneumoniae*. These two bacteria are normally part of the nasopharyngeal flora and, the incidence of *H. influenzae* infections occurs at higher rates in winter and spring compared with summer and autumn [17].

## Clinical implications

In clinical settings, and from a public health perspective, the present review suggests a need to address the seasonality of infectious diseases and its subsequent antibiotic use in winter. The high use of certain types of antibiotics in winter warrants attention because of the possible co-selection of resistance and further spread of MDR in clinically important bacteria. Thus, several efforts may be implemented to optimize the use of antibiotics in a specific season.

First, increasing collaboration among physicians prescribing antibiotics may be fundamental to promote prudent antibiotic use by enhancing stewardship programs in primary care and hospital settings. According to the United States Center for Disease Control and Prevention (CDC), appropriate antibiotic stewardship should be properly structured considering the core elements including commitment, implementation of policies and practices, tracking and reporting antibiotic use and resistance, and educational programs to patients and clinicians [34]. We believe that the seasonal variation of the incidence of infectious diseases should be part of such programs to reduce its impact in the seasonality of AMR rates in the community.

Second, implementing educational programs regarding appropriate antibiotic use for patients are necessary. Educational programs have proven to be effective in the reduction of outpatient antibiotic use; for instance, a population-based study in France showed that an intensive educational program helped to decrease the number of prescriptions and to change the dose/duration of the treatment leading to a reduction of penicillin-resistant *S. pneumoniae* carriage in children [35]. Such program should be carried out during the winter season for a higher impact.

Third, according to the WHO, the prevention strategies for infectious diseases are mainly based on vaccination, access to non-contaminated water, sanitation and hygiene in homes, school and health care facilities [36]. This needs to be addressed at the start of the winter season when people are crowding inside. Therefore, international support is necessary to implement programs and health campaigns to increase the awareness of respiratory infections burden. Indeed, in Germany a health campaigns implemented in autumn and winter increased vaccine uptake in elderly people and resulted in a decrease in number of pneumonias [37].

Finally, new strategies are needed at the start of the winter season to reduce the use of antibiotics among such as, implementation of treatment guidelines and appropriate use of diagnostic tests. For instance, in Turkey, a combination of respiratory viral panel (Multiplex PCR panel) and rapid detection of streptococcus antigen limited the use of antibiotics in clinical settings [31]. In primary care, the implementation of point-of-care testing (POCT) of C-reactive protein (CRP) and training to improve communication skills among general practitioners were effective to optimize antibiotic use [38]. Recently, in the United Kingdom, POCT effectiveness was proved by observing a shift in the prescription pattern among general practitioners to less prescribing of antibiotics [39].

### Strengths and limitations

To our knowledge, this is the first comprehensive systematic review and meta-analysis addressing the seasonality of AMR rates in respiratory bacteria and the possible factors underlying this pattern. However, some limitations need to be acknowledged. Firstly, we could not systematically examine the direct effect of the seasonal variation of antibiotic use and seasonality of infectious diseases, because these factors were not examined in most included studies.

Secondly, the meta-analysis we have included two studies assuming equally distributed sampling throughout the study period. This assumption could not be always true, it could be also expected that more isolates are taken in peak-periods of the infection, thus more likely to have peaks in resistance due to higher exposure to antibiotics. However, sensitivity analysis was done comparing results with and without these studies and the seasonality of AMR rates in *S. pneumoniae* remained the same.

Finally, we cannot completely rule out publication bias and its influence on our meta-analysis, because most of the studies were performed in Europe. We could not include six studies in our meta-analysis, because it was not possible to categorize the four seasons. Thus, the potential variation that could occur in countries with a different climate conditions, seasonal incidence of infections and antibiotic use could be underrepresented.

### Conclusion

In this comprehensive systematic review, we found a consistent winter-peak seasonal variation of AMR rates in *S. pneumoniae* to penicillin and to all antibiotics, independently of geographical region. Due to the few available studies, we could not perform a quantitative analysis of seasonality of AMR in *H. influenzae*. The seasonality of AMR rates could result from the seasonality of infectious diseases and the accompanying antibiotic use. Future studies are required to better understand the factors underlying the seasonality of AMR rates such as the seasonal variation of antibiotic use and its temporal association with antimicrobial resistance in clinically important bacteria.

### Supporting information

**S1 Table. PRISMA checklist.**  
(DOCX)

**S1 Text. Databases search strategy and terms.**

(DOCX)

**S2 Text. Modified version of the Newcastle-Ottawa Scale (NOS) for cross-sectional studies.**

(DOCX)

**S2 Table. Quality assessment of included studies (n = 13).**

(DOCX)

**S3 Table. Description of studies describing seasonality of antimicrobial resistance rates in respiratory bacteria.**

(DOCX)

**S4 Table. Description of study weights in each meta-analysis.**

(DOCX)

**S5 Table. Assessment of publication bias. Egger's test.**

(DOCX)

**S1 Fig. Sensitivity analysis forest-plot.**

(DOCX)

**S2 Fig. Funnel plots.**

(DOCX)

## Acknowledgments

We would like to acknowledge the Biomedical Information Specialist from EMC Medical Library, Maarten Engelm Sabrina Gunput, and Elisee Krabbendam for helping us with the updates of literature search for this review. Also, we would like to thank to Eralda Asllanaj and Vincent Jen for their help in the first appraisal of studies, and to Marian Humphrey for checking the English in this manuscript.

## Author Contributions

**Conceptualization:** Evelyn Pamela Martinez, Magda Cepeda, Oscar H. Franco.

**Data curation:** Evelyn Pamela Martinez.

**Formal analysis:** Evelyn Pamela Martinez.

**Investigation:** Evelyn Pamela Martinez, Marija Jovanoska, Wichor M. Bramer, Josje Schoufour, Marija Glisic.

**Methodology:** Magda Cepeda.

**Supervision:** Annelies Verbon, Oscar H. Franco.

**Validation:** Magda Cepeda.

**Writing – original draft:** Evelyn Pamela Martinez.

**Writing – review & editing:** Evelyn Pamela Martinez, Magda Cepeda, Annelies Verbon, Oscar H. Franco.

## References

1. Cilloniz C, Martin-Loeches I, Garcia-Vidal C, San Jose A, Torres A. Microbial Etiology of Pneumonia: Epidemiology, Diagnosis and Resistance Patterns. *Int J Mol Sci*. 2016; 17(12):2120. <https://doi.org/10.3390/ijms17122120> PMID: 27999274.
2. World Health Organization. Pneumonia: WHO; 2016 [updated September 2016; cited 2017 Jun 19]. Available from: <http://www.who.int/mediacentre/factsheets/fs331/en/>.
3. Marco F. BE, García de LJ., Aguilar L. and the Spanish Surveillance Group for Respiratory Pathogens. Streptococcus pneumoniae in community-acquired respiratory tract infections in Spain: the impact of serotype and geographical, seasonal and clinical factors on its susceptibility to the most commonly prescribed antibiotics. *Journal of Antimicrobial Chemotherapy*. 2000; 46:557–64. <https://doi.org/10.1093/jac/46.4.557> PMID: 11020252
4. Siripongpreeda N, Hattasingh W, Amornvipas P, Eampokalap B, Sakoolnam S, Pancharoen C, et al. Frequency and clinical course of invasive pneumococcal disease caused by penicillin-resistant and penicillin-sensitive Streptococcus pneumoniae in Thai children. *Journal of the Medical Association of Thailand*. 2010; 93 (5):S1–5.
5. Hoberman A, Paradise JL, Greenberg DP, Wald ER, Kearney DH, Colborn DK. Penicillin susceptibility of pneumococcal isolates causing acute otitis media in children: Seasonal variation. *Pediatric Infectious Diseases Journal*. 2005; 24(2):115–20. <https://doi.org/10.1097/01.inf.0000151092.85759.6d>
6. Mauldin PD, Salgado CD, Hansen IS, Durup DT, Bosso JA. Attributable Hospital Cost and Length of Stay Associated with Health Care-Associated Infections Caused by Antibiotic-Resistant Gram-Negative Bacteria. *Antimicrobial Agents and Chemotherapy*. 2010; 54(1):109–15. <https://doi.org/10.1128/AAC.01041-09> PMID: 19841152
7. Neidell MJ, Cohen B, Furuya Y, Hill J, Jeon CY, Glied S, et al. Costs of healthcare- and community-associated infections with antimicrobial-resistant versus antimicrobial-susceptible organisms. *Clinical Infectious Diseases*. 2012; 55(6):807–15. Epub 2012/06/16. <https://doi.org/10.1093/cid/cis552> PMID: 22700828.
8. World health Organization. WHO publishes list of bacteria for which new antibiotics are urgently needed 2017. Available from: <http://www.who.int/news-room/detail/27-02-2017-who-publishes-list-of-bacteria-for-which-new-antibiotics-are-urgently-needed>.
9. Suda KJ, Hicks LA, Roberts RM, Hunkler RJ, Taylor TH. Trends and seasonal variation in outpatient antibiotic prescription rates in the United States, 2006 to 2010. *Antimicrobial Agents Chemotherapy*. 2014; 58(5):2763–6. Epub 2014/03/05. <https://doi.org/10.1128/AAC.02239-13> PMID: 24590486; PubMed Central PMCID: PMC3993241.
10. Tam PYI, Madoff LC, O'Connell M, Pelton SI. Seasonal variation in penicillin susceptibility and invasive pneumococcal disease. *Pediatric Infectious Diseases Journal*. 2015; 34(4):456–7. <https://doi.org/10.1097/INF.0000000000000620> PMID: 25379834
11. Vardhan MS, Allen KD. Epidemiology of penicillin-resistant pneumococci in a Merseyside Health District over a 14-year period. *Journal Infection*. 2003; 46(1):23–9. <https://doi.org/10.1053/jinf.2002.1086> PMID: 12504605.
12. Albanese BA, Roche JC, Pass M, Whitney CG, McEllistrem MC, Harrison LH. Geographic, demographic, and seasonal differences in penicillin-resistant Streptococcus pneumoniae in Baltimore. *Clinical Infectious Diseases*. 2002; 34(1):15–21. <https://doi.org/10.1086/323674> PMID: 11731940
13. Baquero F, García-Rodríguez JA, De Lomas JG, Aguilar L, De Anta TJ, Marco F, et al. Antimicrobial resistance of 1,113 Streptococcus pneumoniae isolates from patients with respiratory tract infections in Spain: Results of a 1-year (1996–1997) multicenter surveillance study. *Antimicrobial Agents Chemotherapy*. 1999; 43(2):357–9. PMID: 9925532
14. Dagan R, Barkai G, Givon-Lavi N, Sharf AZ, Vardy D, Cohen T, et al. Seasonality of antibiotic-resistant Streptococcus pneumoniae that causes acute otitis media: A clue for an antibiotic-restriction policy? *The Journal of Infectious Diseases*. 2008; 197(8):1094–102. <https://doi.org/10.1086/528995> PMID: 18419528
15. Stacevičiene I, Petraitiene S, Vaičiuniene D, Alasevičius T, Kiršliene J, Usonis V. Antibiotic resistance of Streptococcus pneumoniae, isolated from nasopharynx of preschool children with acute respiratory tract infection in Lithuania. *BMC Infectious Diseases* 2016; 16(1). <https://doi.org/10.1186/s12879-016-1544-9> PMID: 27206423
16. Hashida K, Shiomori T, Hohchi N, Muratani T, Mori T, Uda T, et al. Nasopharyngeal Haemophilus influenzae carriage in Japanese children attending day-care centers. *Journal Clinical Microbiology*. 2008; 46(3):876–81. <https://doi.org/10.1128/JCM.01726-07> PMID: 18184852
17. Marchisio P, Gironi S, Esposito S, Schito GC, Mannelli S, Principi N, et al. Seasonal variations in nasopharyngeal carriage of respiratory pathogens in healthy Italian children attending day-care centres or

- schools. *Journal of Medical Microbiology*. 2001; 50(12):1095–9. <https://doi.org/10.1099/0022-1317-50-12-1095> PMID: 11761195.
18. Goossens H, Ferech M, Vander Stichele R, Elseviers M. Outpatient antibiotic use in Europe and association with resistance: a cross-national database study. *Lancet (London, England)*. 2005; 365(9459):579–87. Epub 2005/02/15. [https://doi.org/10.1016/s0140-6736\(05\)17907-0](https://doi.org/10.1016/s0140-6736(05)17907-0) PMID: 15708101.
  19. Meumann EM, Mitchell BG, McGregor A, McBryde E, Cooley L. Urinary *Escherichia coli* antimicrobial susceptibility profiles and their relationship with community antibiotic use in Tasmania, Australia. *International Journal of Antimicrobial Agents*. 2015; 46(4):389–93. <https://doi.org/10.1016/j.ijantimicag.2015.05.015> PMID: 26187365
  20. Rao S, Van Donkersgoed J, Bohaychuk V, Besser T, Song XM, Wagner B, et al. Antimicrobial drug use and antimicrobial resistance in enteric bacteria among cattle from Alberta feedlots. *Foodborne Pathology and Disease*. 2010; 7(4):449–57.
  21. Moher D, Liberati A, Tetzlaff J, Altman DG, The PRISMA Statement. Preferred Reporting Items for Systematic Reviews and Meta-Analyses: The PRISMA Statement. *PLOS Medicine*. 2009; 6(7):e1000097. <https://doi.org/10.1371/journal.pmed.1000097> PMID: 19621072
  22. Bramer WM, Milic J, Mast F. Reviewing retrieved references for inclusion in systematic reviews using EndNote. *Journal of the Medical Library Association: JMLA*. 2017; 105(1):84–7. <https://doi.org/10.5195/jmla.2017.111> PMID: 28096751.
  23. GA Wells BS, O'Connell D, Peterson J, Welch V, Losos M, Tugwell P. The Newcastle-Ottawa Scale (NOS) for assessing the quality of nonrandomised studies in meta-analyses: The Ottawa Hospital, Research Institute; S/N. Available from: [http://www.ohri.ca/programs/clinical\\_epidemiology/oxford.asp](http://www.ohri.ca/programs/clinical_epidemiology/oxford.asp).
  24. Guevara S, Soley C, Arguedas A, Porat N, Dagan R. Seasonal distribution of otitis media pathogens among Costa Rican children. *Pediatric Infectious Diseases Journal*. 2008; 27(1):12–6. <https://doi.org/10.1097/INF.0b013e3181468643> PMID: 18162931
  25. Boken DJ, Chartrand SA, Goering RV, Kruger R, Harrison CJ. Colonization with penicillin-resistant *Streptococcus pneumoniae* in a child-care center. *Pediatric Infectious Diseases Journal* 1995; 14(10):879–84.
  26. Elseviers MM, Ferech M, Vander Stichele RH, Goossens H. Antibiotic use in ambulatory care in Europe (ESAC data 1997–2002): trends, regional differences and seasonal fluctuations. *Pharmacoepidemiology and drug safety*. 2007; 16(1):115–23. Epub 2006/05/16. <https://doi.org/10.1002/pds.1244> PMID: 16700079.
  27. Scott FD, Cynthia GW, Carolyn W, Charles ER, Anne S. Seasonal Patterns of Invasive Pneumococcal Disease. *Emerging Infectious Disease journal*. 2003; 9(5):574. <https://doi.org/10.3201/eid0905.020556> PMID: 12737741
  28. Fisman DN. Seasonality of infectious diseases. *Annual review of public health*. 2007; 28:127–43. Epub 2007/01/16. <https://doi.org/10.1146/annurev.publhealth.28.021406.144128> PMID: 17222079.
  29. Muhlemann K, Uehlinger DE, Buchi W, Gorgievski M, Aebi C. The prevalence of penicillin-non-susceptible *Streptococcus pneumoniae* among children aged < 5 years correlates with the biannual epidemic activity of respiratory syncytial virus. *Clin Microbiol Infect*. 2006; 12(9):873–9. [https://doi.org/10.1111/j.1469-0691.2006.1472\\_1.x](https://doi.org/10.1111/j.1469-0691.2006.1472_1.x) PMID: 16882292.
  30. Mandell LA, Wunderink RG, Anzueto A, Bartlett JG, Campbell GD, Dean NC, et al. Infectious Diseases Society of America/American Thoracic Society consensus guidelines on the management of community-acquired pneumonia in adults. *Clinical Infectious Diseases*. 2007; 44 Suppl 2:S27–72. Epub 2007/02/06. <https://doi.org/10.1086/511159> PMID: 17278083.
  31. Dut R, Kocagöz S. Clinical Signs and Diagnostic Tests in Acute Respiratory Infections. *The Indian Journal of Pediatrics*. 2016; 83(5):380–5. <https://doi.org/10.1007/s12098-015-1943-8> PMID: 26687497
  32. Fleming-Dutra KE, Hersh AL, Shapiro DJ, Bartoces M, Enns EA, File TM, et al. Prevalence of inappropriate antibiotic prescriptions among US ambulatory care visits, 2010–2011. *Jama*. 2016; 315(17):1864–73. <https://doi.org/10.1001/jama.2016.4151> PMID: 27139059
  33. Deschepper R, Vander Stichele RH, Haaijer-Ruskamp FM. Cross-cultural differences in lay attitudes and utilisation of antibiotics in a Belgian and a Dutch city. *Patient education and counseling*. 2002; 48(2):161–9. Epub 2002/10/29. PMID: 12401419.
  34. Core elements of outpatient antibiotic stewardship, (2016).
  35. Guillemot D, Varon E, Bernède C, Weber P, Henriot L, Simon S, et al. Reduction of Antibiotic Use in the Community Reduces the Rate of Colonization with Penicillin G—Nonsusceptible *Streptococcus pneumoniae*. *Clinical Infectious Diseases*. 2005; 41(7):930–8. <https://doi.org/10.1086/432721> PMID: 16142656

36. Reinhart K, Daniels R, Kissoon N, Machado FR, Schachter RD, Finfer S. Recognizing Sepsis as a Global Health Priority—A WHO Resolution. *New England Journal of Medicine*. 2017; 377(5):414–7. <https://doi.org/10.1056/NEJMp1707170> PMID: 28658587
37. Betsch C, Rossmann C, Pletz MW, Vollmar HC, Freytag A, Wichmann O, et al. Increasing influenza and pneumococcal vaccine uptake in the elderly: study protocol for the multi-methods prospective intervention study Vaccination60. *BMC Public Health*. 2018; 18(1):885–. <https://doi.org/10.1186/s12889-018-5787-9> PMID: 30012141.
38. Cals JWL, Butler CC, Hopstaken RM, Hood K, Dinant G-J. Effect of point of care testing for C reactive protein and training in communication skills on antibiotic use in lower respiratory tract infections: cluster randomised trial. *BMJ*. 2009; 338:b1374. <https://doi.org/10.1136/bmj.b1374> PMID: 19416992
39. Ward C. Point-of-care C-reactive protein testing to optimise antibiotic use in a primary care urgent care centre setting. *BMJ Open Quality*. 2018; 7(4):e000391. <https://doi.org/10.1136/bmjopen-2018-000391> PMID: 30397661
